# Supplementary material
Source: HighWire-hosted journal article supplement (https://jnm.snmjournals.org/highwire/filestream/95326/field_highwire_adjunct_files/0/215350_Supplemental_Data.pdf)
Supplement: 215350_Supplemental_Data.pdf [file 215350_Supplemental_Data.pdf]

**Supplemental Table 1.** Effect of MSG on biodistribution of <sup>68</sup>Ga-PSMA-11 in LNCaP tumor-bearing mice at 1 h post-injection.

|                        | MSG 657 mg/kg |    | MSG 329 mg/kg |   | MSG 164 mg/kg |   | PBS       |    |
|------------------------|---------------|----|---------------|---|---------------|---|-----------|----|
|                        | mean±SD       | n  | mean±SD       | n | mean±SD       | n | mean±SD   | n  |
| <b>Blood</b>           | 0.26±0.08     | 10 | 0.24±0.02     | 5 | 0.31±0.04     | 5 | 0.31±0.08 | 17 |
| <b>Fat</b>             | 0.65±0.20     | 10 | 1.14±0.25     | 5 | 2.49±0.96     | 5 | 2.25±0.75 | 17 |
| <b>Spleen</b>          | 4.31±1.98     | 10 | 7.91±3.44     | 5 | 19.5±6.19     | 5 | 22.2±7.91 | 17 |
| <b>Liver</b>           | 0.33±0.06     | 10 | 0.33±0.01     | 5 | 0.41±0.05     | 5 | 0.44±0.13 | 17 |
| <b>Pancreas</b>        | 0.33±0.05     | 9  | 0.57±0.11     | 4 | 1.21±0.33     | 5 | 1.44±0.39 | 17 |
| <b>Adrenals</b>        | 2.45±1.20     | 9  | 5.30±3.61     | 3 | 8.67±2.16     | 5 | 7.47±2.36 | 13 |
| <b>Kidneys</b>         | 85.8±24.2     | 10 | 159±26.2      | 5 | 211±27.4      | 5 | 182±33.5  | 17 |
| <b>Muscle</b>          | 0.20±0.08     | 9  | 0.33±0.07     | 4 | 0.55±0.11     | 5 | 0.54±0.14 | 16 |
| <b>Tumor</b>           | 8.42±1.40     | 10 | 7.19±0.86     | 5 | 8.20±2.44     | 5 | 8.67±1.97 | 17 |
| <b>Salivary glands</b> | 3.72±2.12     | 10 | 5.74±0.62     | 5 | 14.2±4.27     | 5 | 10.0±2.52 | 16 |
